# Supplementary material for: Methylation Levels of LINE-1 As a Useful Marker for Venous Invasion in Both FFPE and Frozen Tumor Tissues of Gastric Cancer
Source: PubMed Central journal article supplement — Mol Cells. 2017 May 22;40(5):346–54. doi: 10.14348/molcells.2017.0013 (PMC5463043; doi:10.14348/molcells.2017.0013), 2017-05-22
Supplement: molce-40-5-346-supple.pdf [file molce-40-5-346-supple.pdf]

### Supplementary figure 1.

Four CpG sites of LINE-1 analyzed in bisulfite-converted DNA

CpG 1                  CpG 2   CpG 3                          CpG 4  
me                      me    me                                  me  
|                      |    |                                  |

Antisense 5' CT**C**GTGGTG**C**GC**C**GTTTCTTAAG**C**CGG 3'

Antisense-bisulfite converted 3' TT**C**GTGGTG**C**GT**C**GTTTTTTAAGT**C**CGG 5'

### Supplementary figure 2.

The differences of LINE-1 methylation level (%) between frozen and FFPE tissues were observed at CpG3 and CpG4 ( $p < 0.001$ ,  $p < 0.001$ , respectively).

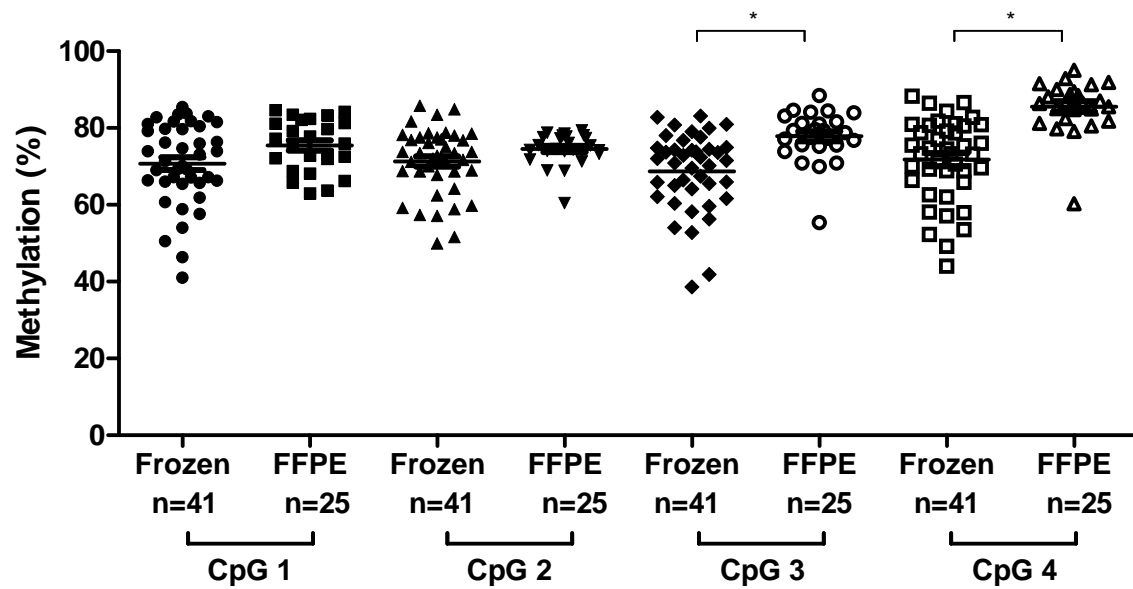

### Supplementary figure 3.

The average LINE-1 methylation levels at CpG1 and CpG4 together were significantly hypomethylated in the presence of venous invasion in frozen tissues, FFPE tissues and combined ( $p = 0.018$ ,  $p = 0.038$ ,  $p = 0.002$ , respectively).

\* $p < 0.05$  (unpaired  $t$  test).

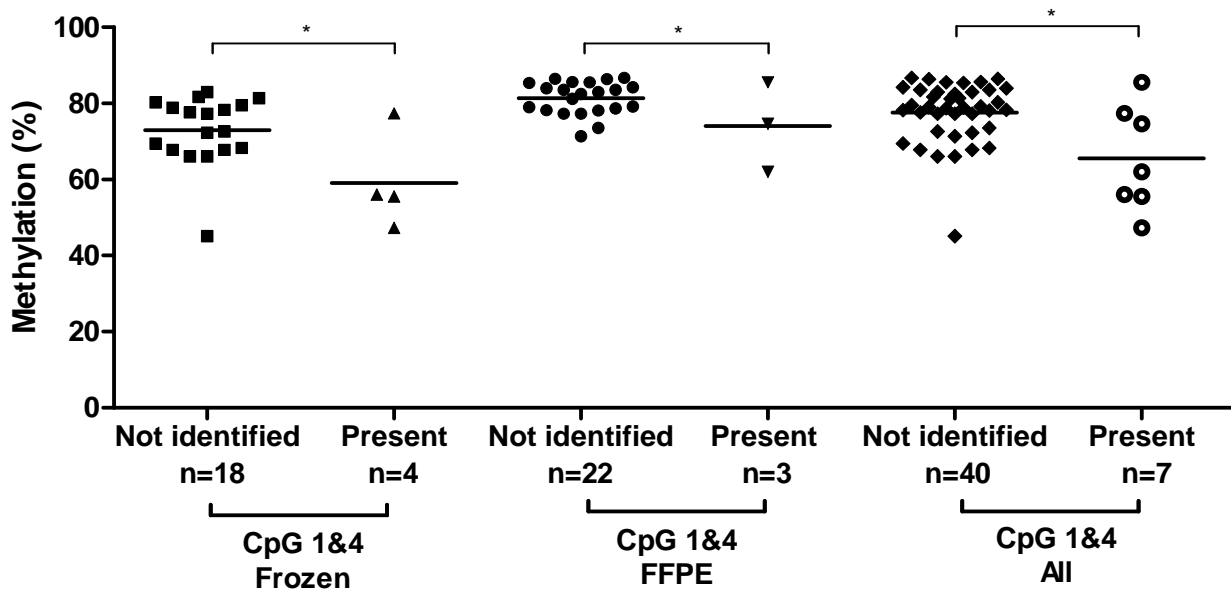

**Table S1. Clinicopathological characteristics of patients with GC in frozen tissue set in this study**

| Characteristic               | Gastric cancer (n=41) | Percentage |
|------------------------------|-----------------------|------------|
| <b>Gender</b>                |                       |            |
| Male                         | 30                    | 73.17%     |
| Female                       | 11                    | 26.83%     |
| <b>Age, years</b>            |                       |            |
| ≤ 61                         | 18                    | 43.90%     |
| > 61                         | 23                    | 56.10%     |
| <b>T classification</b>      |                       |            |
| T1                           | 0                     | 0.00%      |
| T2                           | 14                    | 34.15%     |
| T3                           | 20                    | 48.78%     |
| T4                           | 7                     | 17.07%     |
| <b>N classification</b>      |                       |            |
| N0                           | 15                    | 36.59%     |
| N1                           | 7                     | 17.07%     |
| N2                           | 8                     | 19.51%     |
| N3                           | 11                    | 26.83%     |
| <b>Distance metastasis</b>   |                       |            |
| Absent                       | 39                    | 95.12%     |
| Present                      | 2                     | 4.88%      |
| <b>TNM stage</b>             |                       |            |
| I                            | 0                     | 0.00%      |
| II                           | 26                    | 63.41%     |
| III                          | 13                    | 31.71%     |
| IV                           | 2                     | 4.88%      |
| <b>Lauren Classification</b> |                       |            |
| Intestinal                   | 20                    | 48.78%     |
| Diffuse                      | 12                    | 29.27%     |
| Mixed                        | 1                     | 2.44%      |
| Unknown                      | 8                     | 19.51%     |
| <b>WHO classification</b>    |                       |            |
| Differentiated               | 18                    | 43.90%     |
| Undifferentiated             | 20                    | 48.78%     |
| Unknown                      | 3                     | 7.32%      |
| <b>Tumor location</b>        |                       |            |
| Upper                        | 11                    | 26.83%     |
| Middle                       | 8                     | 19.51%     |
| Lower                        | 21                    | 51.22%     |
| Entire                       | 1                     | 2.44%      |

---

|                             |    |        |
|-----------------------------|----|--------|
| <b>Lymphatic invasion</b>   |    |        |
| Identified                  | 11 | 26.83% |
| Present, mural, peritumoral | 11 | 26.83% |
| Unknown                     | 19 | 46.34% |
| <b>Venous invasion</b>      |    |        |
| Identified                  | 18 | 43.90% |
| Present, mural, peritumoral | 4  | 9.76%  |
| Unknown                     | 19 | 46.34% |
| <b>Perineural invasion</b>  |    |        |
| Identified                  | 16 | 39.02% |
| Present, mural, peritumoral | 6  | 14.63% |
| Unknown                     | 19 | 46.34% |

---

**Table S2. Clinicopathological characteristics of patients with GC in FFPE tissue set in this study**

| <b>Characteristic</b>        | <b>Gastric cancer (n=25)</b> | <b>Percentage</b> |
|------------------------------|------------------------------|-------------------|
| <b>Gender</b>                |                              |                   |
| Male                         | 12                           | 48.00%            |
| Female                       | 13                           | 52.00%            |
| <b>Age, years</b>            |                              |                   |
| ≤ 57                         | 14                           | 56.00%            |
| > 57                         | 11                           | 44.00%            |
| <b>T classification</b>      |                              |                   |
| T1                           | 12                           | 48.00%            |
| T2                           | 0                            | 0.00%             |
| T3                           | 1                            | 4.00%             |
| T4                           | 12                           | 48.00%            |
| <b>N classification</b>      |                              |                   |
| N0                           | 13                           | 52.00%            |
| N1                           | 0                            | 0.00%             |
| N2                           | 0                            | 0.00%             |
| N3                           | 12                           | 48.00%            |
| <b>Distance metastasis</b>   |                              |                   |
| Absent                       | 23                           | 92.00%            |
| Present                      | 2                            | 8.00%             |
| <b>TNM stage</b>             |                              |                   |
| I                            | 0                            | 0.00%             |
| II                           | 23                           | 92.00%            |
| III                          | 0                            | 0.00%             |
| IV                           | 2                            | 8.00%             |
| <b>Lauren Classification</b> |                              |                   |
| Intestinal                   | 8                            | 32.00%            |
| Diffuse                      | 15                           | 60.00%            |
| Mixed                        | 1                            | 4.00%             |
| Unknown                      | 1                            | 4.00%             |
| <b>WHO classification</b>    |                              |                   |
| Differentiated               | 6                            | 24.00%            |
| Undifferentiated             | 15                           | 60.00%            |
| Unknown                      | 4                            | 16.00%            |
| <b>Tumor location</b>        |                              |                   |
| Upper                        | 5                            | 20.00%            |
| Middle                       | 5                            | 20.00%            |
| Lower                        | 15                           | 60.00%            |
| Entire                       | 0                            | 0.00%             |

---

|                             |    |        |
|-----------------------------|----|--------|
| <b>Lymphatic invasion</b>   |    |        |
| Identified                  | 11 | 44.00% |
| Present, mural, peritumoral | 14 | 56.00% |
| Unknown                     | 0  | 0.00%  |
| <b>Venous invasion</b>      |    |        |
| Identified                  | 22 | 88.00% |
| Present, mural, peritumoral | 3  | 12.00% |
| Unknown                     | 0  | 0.00%  |
| <b>Perineural invasion</b>  |    |        |
| Identified                  | 12 | 48.00% |
| Present, mural, peritumoral | 13 | 52.00% |
| Unknown                     | 0  | 0.00%  |

---

**Table S3. Primers for LINE-1 methylation analysis**

| <b>LINE-1 methylation analysis</b> | <b>Forward primer (5' → 3')</b> |
|------------------------------------|---------------------------------|
| Forward primer for PCR (5' → 3')   | TTTGTAGGTAGGTGTGGGATATA         |
| Reverse primer for PCR (5' → 3')   | Biotin-AAAATCAAAAAATTCCCTTTC    |
| Sequencing primer (5' → 3')        | AGTTAGGTGTGGGATATAGT            |
